# Supplementary material for: Evolution of Characteristics of the Zone of Rock Loosening with Cross-Sectional Area
Source: Hindawi journal article supplement (doi:10.1155/2021/8871524), 2021-08-28
Supplement: f1 [file 8871524.f1.pdf]

## Supplementary Materials

Additional supporting information of tested data is provided in this section.

Supplementary material I: Borehole data of 1302 North bottom extraction roadway (Figure 7)

| Distance | 3-1borehole Wave speed | 3-2borehole Wave speed | 2-1borehole Wave speed | 2-2borehole Wave speed |
|----------|------------------------|------------------------|------------------------|------------------------|
| 1.1      | 1406                   | 1358.6667              | 1500                   |                        |
| 1.2      | 1317.3333              | 1313                   | 1680.75                | 1309                   |
| 1.3      | 1316.3333              | 1440                   | 1687.99995             | 1405.5                 |
| 1.4      | 1428.5                 | 1339                   | 1699.99995             | 1354.5                 |
| 1.5      | 1448.3333              | 1377.3333              | 1694.625               | 1353.25                |
| 1.6      | 1356.3333              | 1329.3333              | 1648.5                 | 1381.75                |
| 1.7      | 1380.25                | 1465.3333              | 1664.25                | 1361.6667              |
| 1.8      | 1367.6667              | 1352.3333              | 1807.125               | 1351                   |
| 1.9      | 1296                   | 1322                   | 1792.5                 | 1453.3333              |
| 2        | 1435.75                | 1446                   | 1834.5                 | 1489.75                |
| 2.1      | 1364.75                | 1358.6667              | 1962                   | 1479.3333              |
| 2.2      | 1352.6667              | 1357.3333              | 1722                   | 1402                   |
| 2.3      | 1394                   | 1654.25                | 1963.5                 | 1665.3333              |
| 2.4      | 1697                   | 1768.75                | 2104.875               | 1711                   |
| 2.5      | 1787.75                | 1799.3333              | 2254.99995             | 1603                   |
| 2.6      | 1728.3333              | 1738                   | 2401.5                 | 1649                   |
| 2.7      | 1677.6667              | 1673                   | 2402.50005             | 1665                   |
| 2.8      | 1652.6667              | 1643.5                 | 2385.75                | 1648.6667              |
| 2.9      | 1660.25                | 1644.25                | 1913.25                | 1629                   |
| 3        | 1669.6667              | 1550.3333              | 1893.75                | 1632.3333              |
| 3.1      | 1662                   | 1561                   | 1888.5                 | 1707                   |
| 3.2      | 1507                   | 1649                   | 1940.25                | 1663.6667              |
| 3.3      | 1669                   | 1666.3333              | 1897.5                 | 1538.75                |
| 3.4      | 1652.5                 | 1705.25                | 1881.75                | 1664                   |
| 3.5      | 1602.6667              | 1680                   | 1907.50005             | 1664                   |
| 3.6      | 1648.6667              | 1671.5                 | 1935.75                | 1675                   |
| 3.7      | 1695                   | 1672.5                 | 1918.99995             | 1570.3333              |
| 3.8      | 1668                   | 1678.5                 | 1914                   | 1665                   |
| 3.9      | 1674.25                | 1669                   | 1890                   | 1659.6667              |
| 4        | 1682.75                | 1669                   | 1912.5                 | 1699                   |
| 4.1      | 1685.25                | 1675.5                 | 1920.75                | 1680                   |
| 4.2      | 1706.25                | 1713.25                | 1918.5                 | 1687.3333              |
| 4.3      | 1748                   | 1744                   | 1940.25                | 1663                   |
| 4.4      | 1673.6667              |                        | 1910.25                | 1693                   |

Supplementary material II: Drilling data of central auxiliary transportation lane(Figure 8)

| Dis<br>tan<br>ce | 1-1borehole<br>Wave speed | 1-2borehole<br>Wave speed | 2-1borehole<br>Wave speed | 2-2borehole<br>Wave speed | 3-1borehole<br>Wave speed | 3-2borehole<br>Wave speed |
|------------------|---------------------------|---------------------------|---------------------------|---------------------------|---------------------------|---------------------------|
| 0.6              | 1407.3333                 | 1341.3333                 | --                        | 1221.6667                 | --                        | --                        |
| 0.7              | 1398.75                   | 1307                      | --                        | 1233.5                    | --                        | 1228                      |
| 0.8              | 1373.75                   | 1418.75                   | --                        | 1217.5                    | 1215                      | 1191                      |
| 0.9              | 1452.25                   | 1388.5                    | --                        | 1181.5                    | 1106                      | 1208                      |
| 1                | 1423.75                   | 1370.5                    | --                        | 1185.25                   | 1243.3333                 | 1213.75                   |
| 1.1              | 1413.75                   | 1277.75                   | 1589.6667                 | 1209.5                    | 1227                      | 1202.75                   |
| 1.2              | 1409                      | 1368.25                   | 1418.25                   | 1182.5                    | 1162.3333                 | 1253.5                    |
| 1.3              | 1303.6667                 | 1372.5                    | 1422.6667                 | 983.25                    | 1068.25                   | 1231                      |
| 1.4              | 1352.25                   | 1296                      | 1401.5                    | 1221.5                    | 1197.25                   | 1158.75                   |
| 1.5              | 1391.25                   | 1320.5                    | 1383                      | 1010.25                   | 1152                      | 1129.5                    |
| 1.6              | 1310                      | 1491                      | 1252                      | 1200.5                    | 1071.5                    | 1182.75                   |
| 1.7              | 1268.5                    | 1554.3333                 | 1362                      | 1200                      | 1197.75                   | 1141.3333                 |
| 1.8              | 1279.25                   | 1463.5                    | 1148.6667                 | 1172.25                   | 1164.5                    | 1148                      |
| 1.9              | 1298                      | 1283                      | 1400.75                   | 1224.25                   | 1152.75                   | 1112.6667                 |
| 2                | 1304.25                   | 1581.75                   | 1521.25                   | 1181.75                   | 1148.25                   | 1143.25                   |
| 2.1              | 1409                      | 1397                      | 1324.5                    | 1150.25                   | 1135.25                   | 1182.5                    |
| 2.2              | 1377                      | 1444                      | 1320                      | 1232.5                    | 1186.5                    | 1177.75                   |
| 2.3              | 1146.75                   | 1429.5                    | 1454                      | 1255                      | 1153.3333                 | 1194.25                   |
| 2.4              | 1421.75                   | 1380.1                    | 1352.25                   | 1171.75                   | 1184.75                   | 1204.5                    |
| 2.5              | 1173                      | 1389.5                    | 1381.6667                 | 1239.5                    | 1143                      | 1209.5                    |
| 2.6              | 1215.5                    | 1226.25                   | 1328                      | 1238.5                    | 1203                      | 1209.6667                 |
| 2.7              | 1254.75                   | 1974.75                   | 1932                      | 1381.75                   | 1300.6667                 | 1223                      |
| 2.8              | 1342.5                    | 1680.25                   | 1805.5                    | 1650.25                   | 1318.5                    | 1322.25                   |
| 2.9              | 1690.5                    | 1722.75                   | 1910                      | 1632.5                    | 1317                      | 1366.75                   |
| 3                | 1751.5                    | 1580.5                    | 1735.5                    | 1355                      | 1323                      | 1578.75                   |
| 3.1              | 1802.75                   | 2034                      | 1646.6667                 | 1313.75                   | 1313.25                   | 1452.75                   |
| 3.2              | 1780                      | 1920.25                   | 1505                      | 1326.25                   | 1409.75                   | 1566.75                   |
| 3.3              | 1725.5                    | 1652.5                    | 1626.25                   | 1382.5                    | 1347.75                   | 1381.25                   |
| 3.4              | 1687                      | 1768.25                   | 1706.25                   | 1367.25                   | 1316                      | 1342.5                    |
| 3.5              | 1413.5                    | 1707.75                   | 1681.5                    | 1256.25                   | 1328                      | 1357.25                   |
| 3.6              | 1638.25                   | 1633.75                   | 1610                      | 1332                      | 1376.5                    | 1340                      |
| 3.7              | 1630                      | 1705.5                    | 1652                      | 1296.25                   | 1330.75                   | 1336                      |
| 3.8              | 1651.4                    | 1708.75                   | 1695                      | 1301.25                   | 1341                      | 1336.5                    |
| 3.9              | 1612                      | 1646.75                   | 1608.75                   | 1343.3333                 | 1244                      | 1355                      |
| 4                | 1614                      | 1753.5                    | 1412.25                   | 1347                      | 1258                      | 1339.75                   |
| 4.1              | 1627.25                   | 1404                      | 1705.5                    | 1313.3333                 | 1277.5                    | 1252.25                   |
| 4.2              | 1634.5                    | 1640.25                   | 1712.5                    | 1334                      | 1315.25                   | 1327.25                   |
| 4.3              | 1619.5                    | 1806.25                   | 1676.5                    | 1379                      | 1285.25                   | 1353                      |

|     |      |         |         |           |         |    |
|-----|------|---------|---------|-----------|---------|----|
| 4.4 | 1683 | 1656    | 1768    | 1365.3333 | 1292.75 | -- |
| 4.5 | --   | 1695.75 | 1615    | 1344      | 1302.5  | -- |
| 4.6 | --   | --      | 1391.75 | 1284.3333 | 1277.5  | -- |
| 4.7 | --   | --      | --      | 1257.3333 | 1264.75 | -- |
